# Supplementary material for: Isolated and Syndromic Retinal Dystrophy Caused by Biallelic Mutations in RCBTB1, a Gene Implicated in Ubiquitination
Source: PubMed Central journal article supplement — Am J Hum Genet. 2016 Aug 2;99(2):470–80. doi: 10.1016/j.ajhg.2016.06.017 (PMC4974088; doi:10.1016/j.ajhg.2016.06.017), 2016-08-02
Supplement: mmc1.pdf [file mmc1.pdf]

**The American Journal of Human Genetics, Volume 99**

**Supplemental Data**

**Isolated and Syndromic Retinal Dystrophy**

**Caused by Biallelic Mutations in *RCBTB1*,**

**a Gene Implicated in Ubiquitination**

**Frauke Coppieters, Giulia Ascari, Katharina Dannhausen, Konstantinos Nikopoulos, Frank Peelman, Marcus Karlstetter, Mingchu Xu, Cécile Brachet, Isabelle Meunier, Miltiadis K. Tsilimbaris, Chrysanthi Tsika, Styliani V. Blazaki, Sarah Vergult, Pietro Farinelli, Thalia Van Laethem, Miriam Bauwens, Marieke De Bruyne, Rui Chen, Thomas Langmann, Ruifang Sui, Françoise Meire, Carlo Rivolta, Christian P. Hamel, Bart P. Leroy, and Elfride De Baere**

## SUPPLEMENTAL DATA

### Supplemental Note: Case Reports

#### Case report S1. Clinical case report of family F1.

**Family history.** Two sisters V:1 and V:2 from a consanguineous Turkish family F1 (Figure 1) were followed in a pediatric endocrinology outpatient clinic. Family history showed a goiter at 38 years of age in the mother (IV:2) and the association of retinitis pigmentosa (RP), goiter, premature ovarian failure and slight intellectual disability in a maternal cousin (IV:3). Both sibs V:1 and V:2 also display RP and slight intellectual disability for which special education is required.

**Sibling V:2.** She presented at 10.3 years of age with a goiter and was complaining of tiredness. Her physical examination showed normal height (142 cm, 0.3 standard deviation score, SDS), normal body mass index ( $18 \text{ kg/m}^2$ , 0.3 SDS) and a pre-pubertal stage. In addition, a low forehead and small teeth were observed. Thyroid ultrasound confirmed the goiter (right lobe 11 ml, left lobe 7 ml) and laboratory results showed normal TSH and fT4, elevated thyroglobulin ( $140 \text{ }\mu\text{g/L}$  [RR 0-25]) reflecting the increased thyroid volume. Gonadotropins were normal for age. No thyroid autoantibodies were detected. Follow-up showed an increase in thyroid volume despite L-thyroxine treatment, requiring subtotal thyroidectomy at 15 years of age. Spontaneous pubertal development started at 12 years and menarche occurred at 14 years, followed by secondary amenorrhea. At 15 years, gonadotropin elevation (Luteinizing hormone LH 10.8; Follicle-stimulating hormone FSH 16.3 U/L) was noted along with undetectable anti-Müllerian hormone (AMH), indicating primary ovarian failure. Further increase in gonadotropins was noted at 15 years of age: LH 23.9 and

FSH 32.7 U/L. Oestrogenic substitution was instituted. She developed overweight over the years.

**Sibling V:1.** The older sister presented with secondary amenorrhea at 16 years of age, after spontaneous pubertal development and menarche at 14 years of age. Her physical examination showed normal height (162.8 cm), overweight (BMI 25 kg/m<sup>2</sup>, 1.1 SDS), small teeth and a goiter. Gonadotropins were elevated (LH 29.7 and FSH 48.9 U/L). Thyroid function tests were normal except for slight thyroglobulin elevation (65 µg/L, RR 0-25), reflecting the increased thyroid volume. No thyroid autoantibodies were detected. Oestrogenic substitution was instituted.

# Supplemental Figures

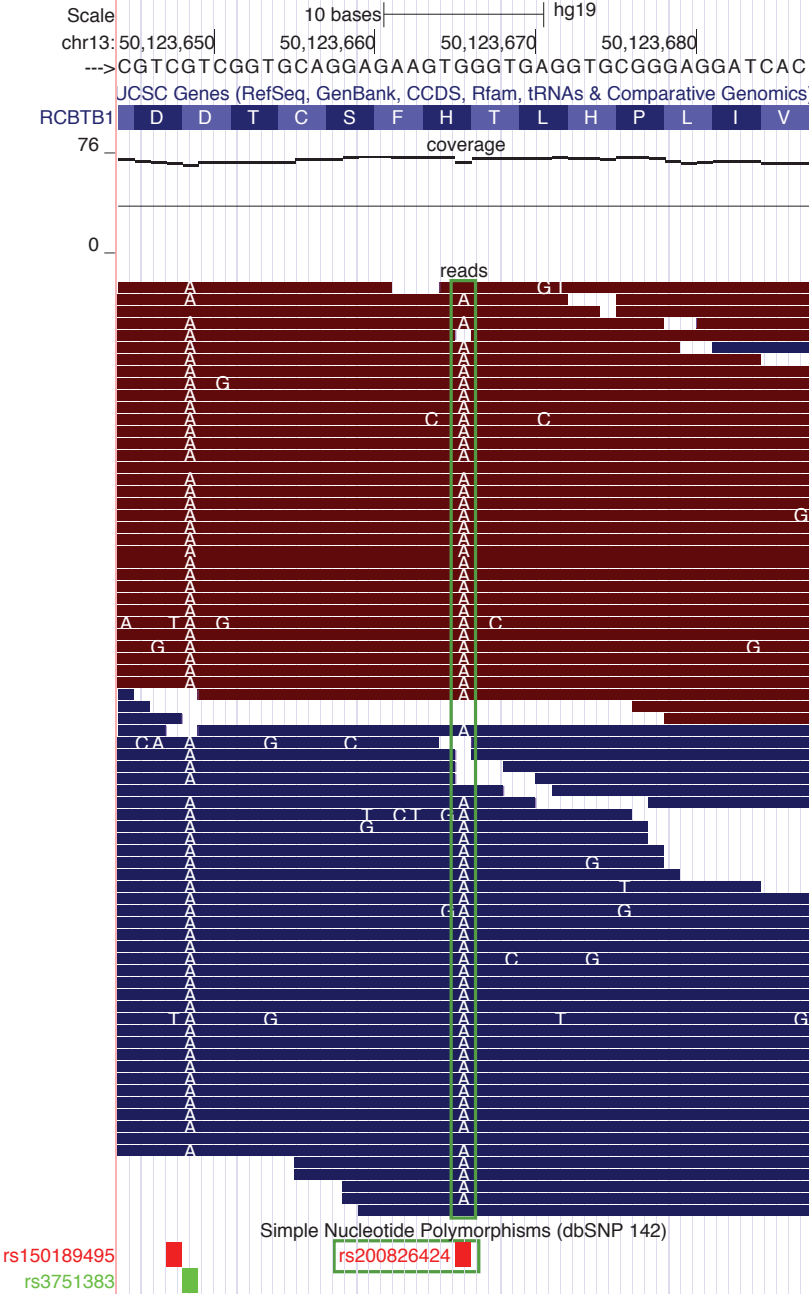

**Figure S1. Sequence reads covering the *RCBTB1* mutation c.973C>T, p.(His325Tyr) (F1)**

Whole exome sequencing (WES) yielded at least 20x coverage for over 91% of target regions (TruSeq Exome Enrichment, HiSeq 2000, Illumina). Read mapping, variant calling and annotation was performed with the CLC Genomics Workbench v. 6.0.4 (Qiagen). The coverage and variant allele frequency of the mutation were respectively 59x (V:1) and 72x (IV:3), and 98% (V:1) and 93% (IV:3). The mutation was confirmed by Sanger sequencing.

### Genome-wide homozygosity in F3 (II:1)

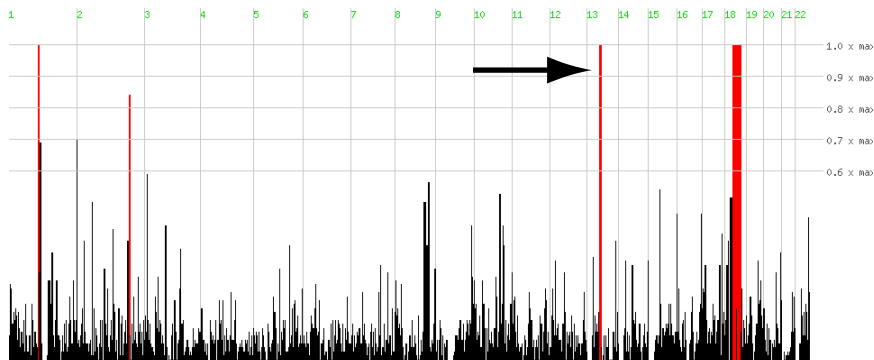

### Genome-wide homozygosity in F4 (III:2)

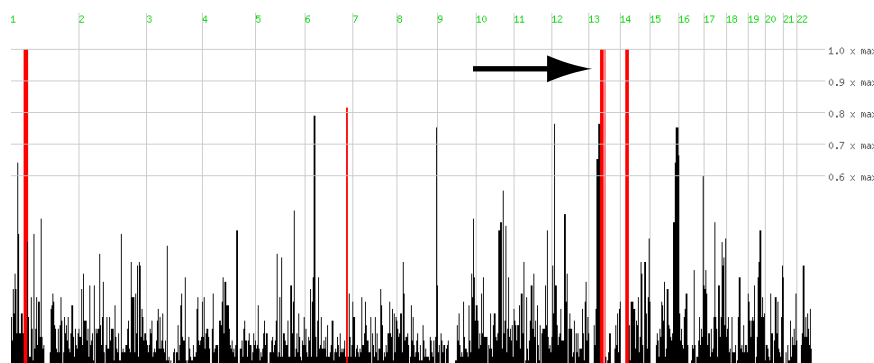

**Figure S2. Homozygous regions in F3 and F4**

Homozygosity mapping was performed on WES data (vcf files) using HomozygosityMapper. *RCBTB1* was located in the 3<sup>rd</sup> and largest homozygous region of F3 and F4, respectively (indicated with a black arrow).

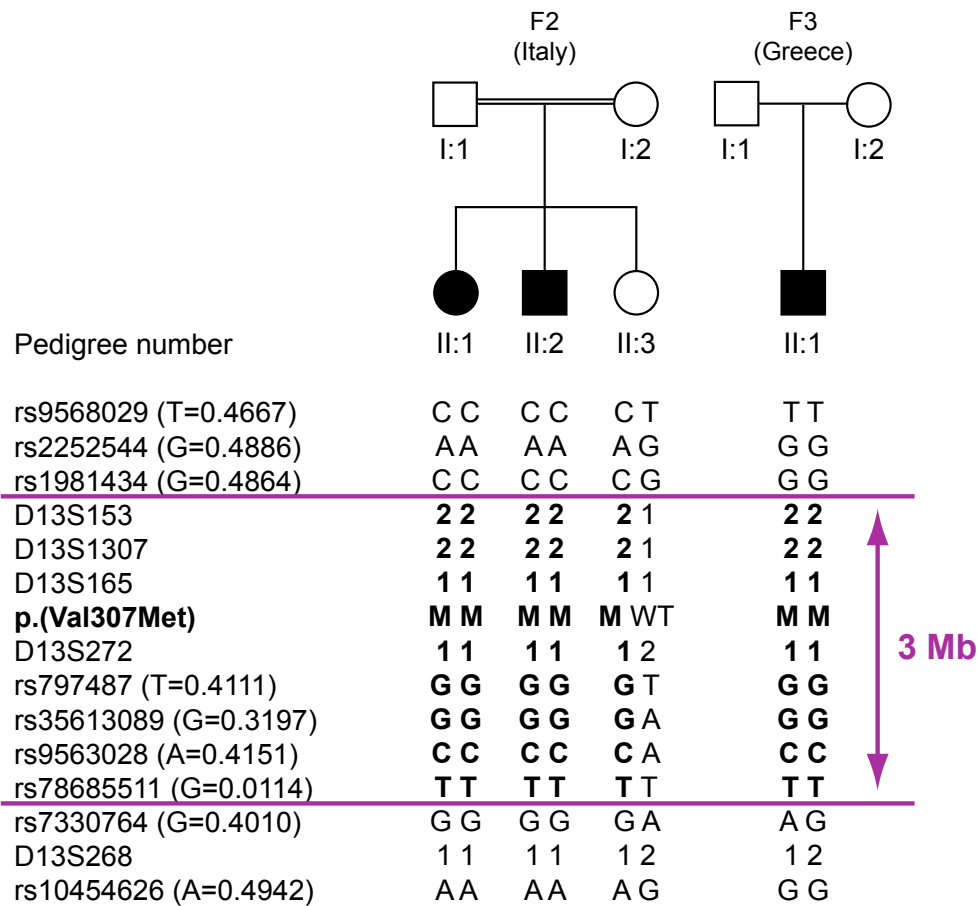

**Figure S3. Haplotype analysis of the *RCBTB1* mutation c.919G>A, p.(Val307Met)**

Segregation analysis of flanking microsatellites and single nucleotide polymorphisms revealed a common haplotype between the affected individuals of F2 and F3 with a maximal size of 3 megabases. For single nucleotide polymorphisms, the minor allele and its frequency are indicated between brackets.

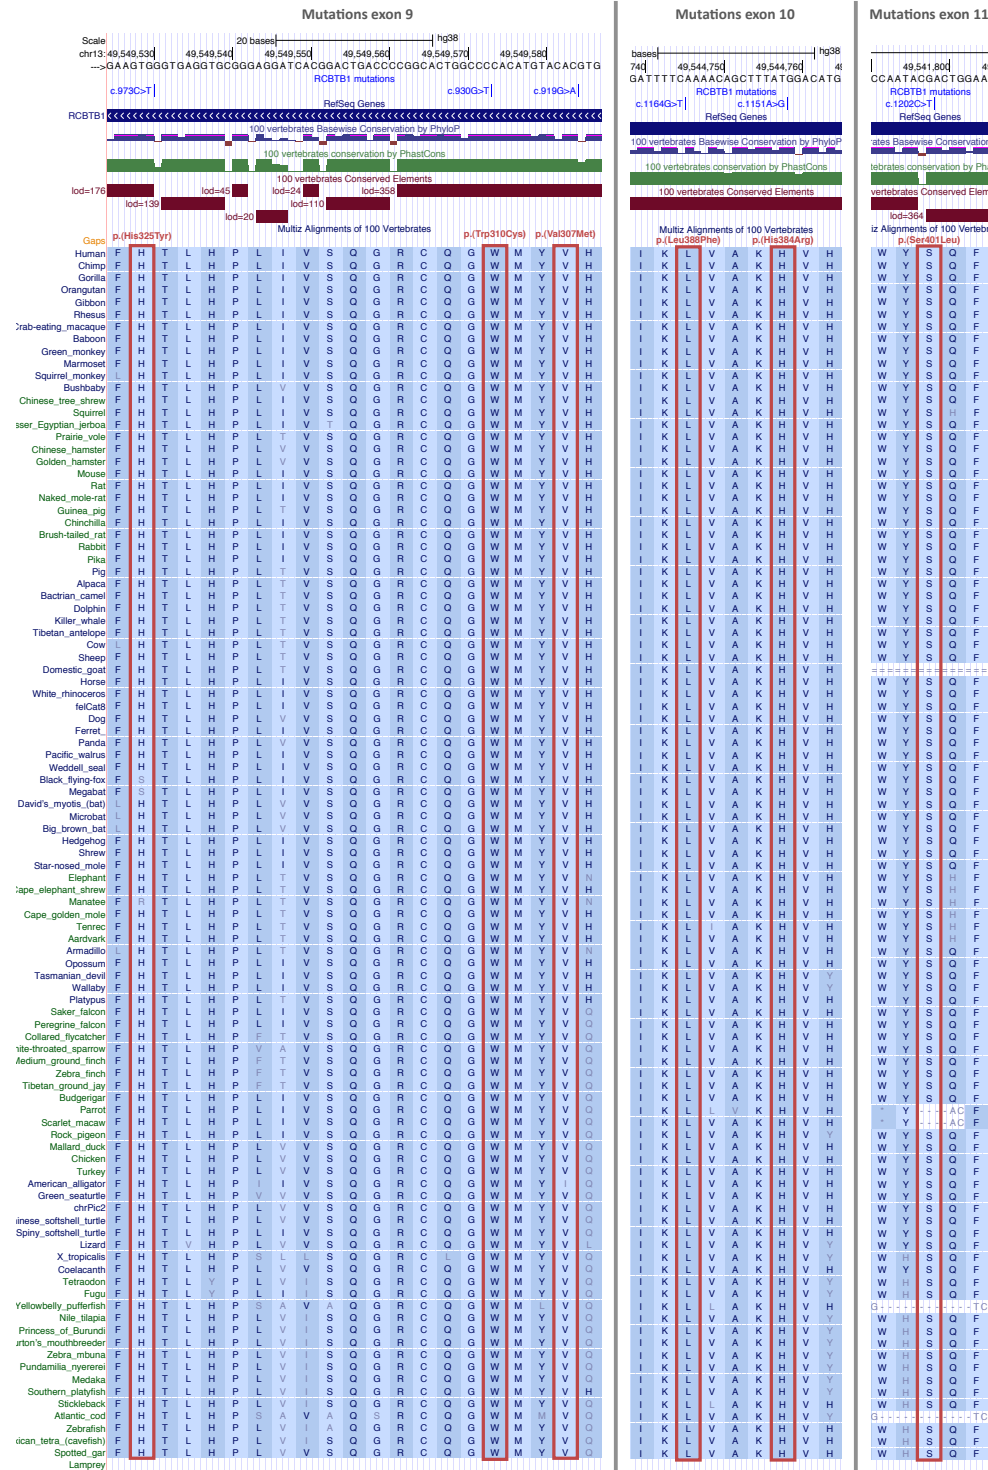

**Figure S4. Nucleotide and amino acid conservation of identified *RCBTB1* missense mutations in 100 vertebrate species**

Source: UCSC Genome Browser, Human GRCh38/hg38 assembly, Conservation track (Vertebrate Multiz Alignment & Conservation (100 Species)).

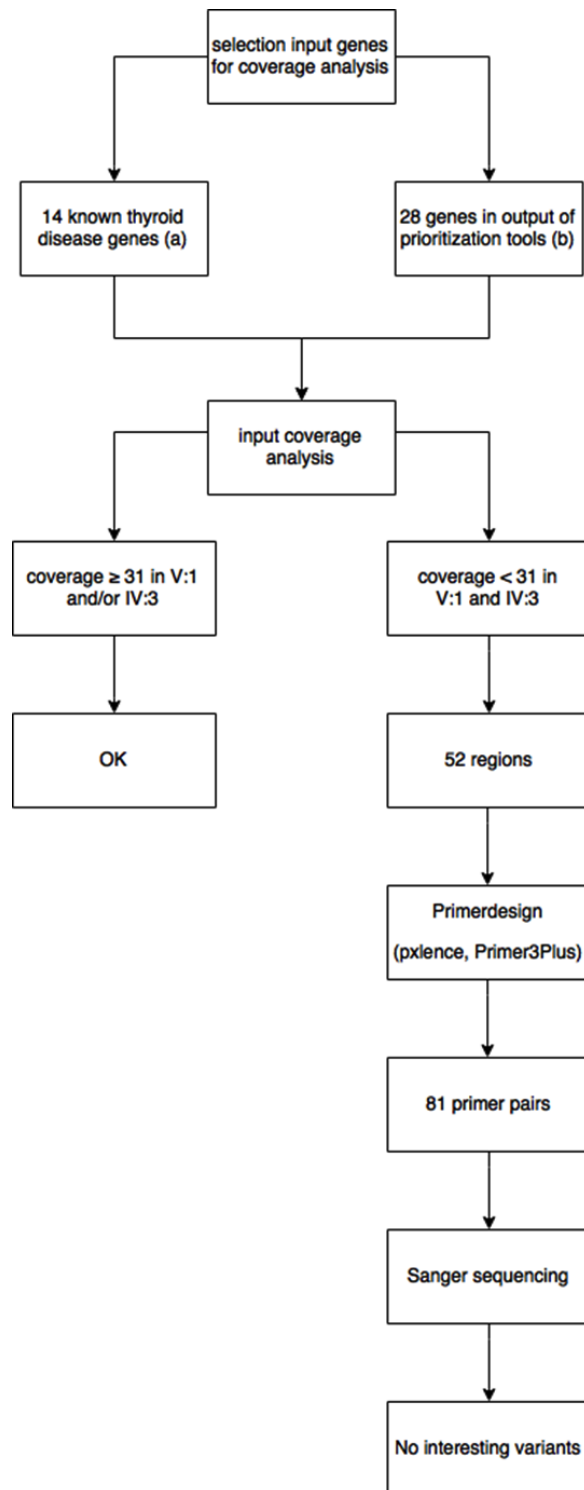

**Figure S5. Sanger sequencing of thyroid related genes insufficiently covered by WES (F1)**

Coverage analysis of a selection of genes was performed for individuals V:1 and IV:3. Input genes were selected based on the prioritization of thyroid disease genes: **(a)** training set, and **(b)** ranked genes lists (Table S5). Regions with coverage  $< 31x$  were analyzed with Sanger sequencing. No potential mutations were found that could explain the thyroid phenotype.



# RCBTB1/Rcbtb1 and CUL3/Cul3 expression in human and murine tissue

## RCBTB1/Rcbtb1

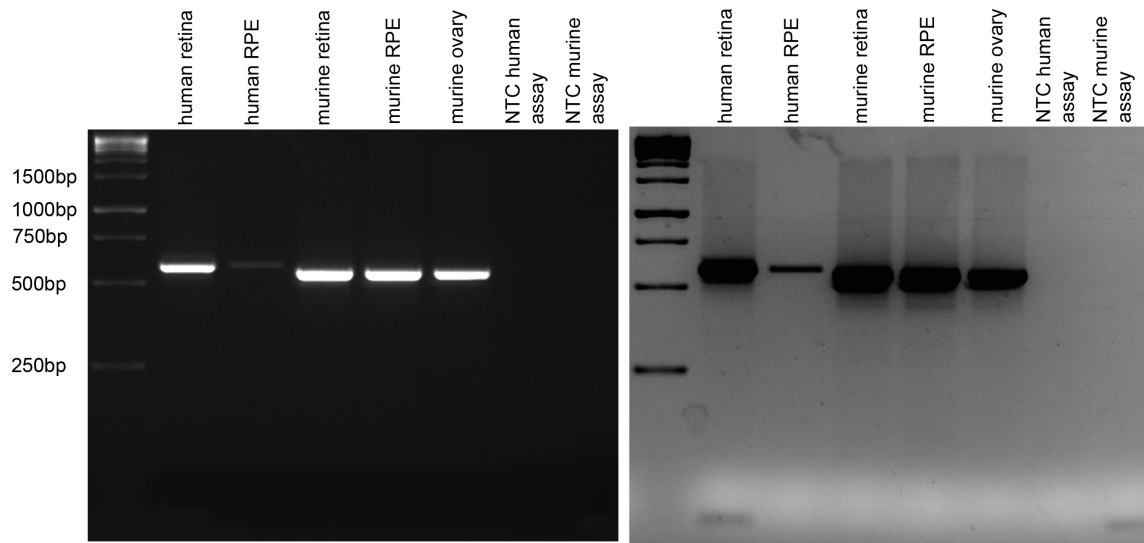

inverse image and higher exposure time

## CUL3/Cul3

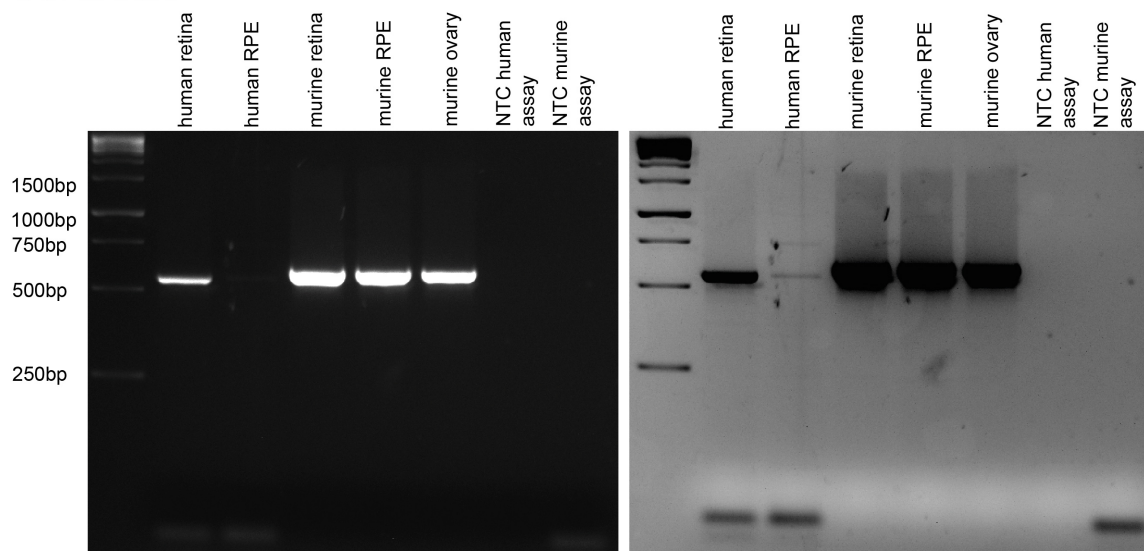

inverse image and higher exposure time

## ACTB/Actb

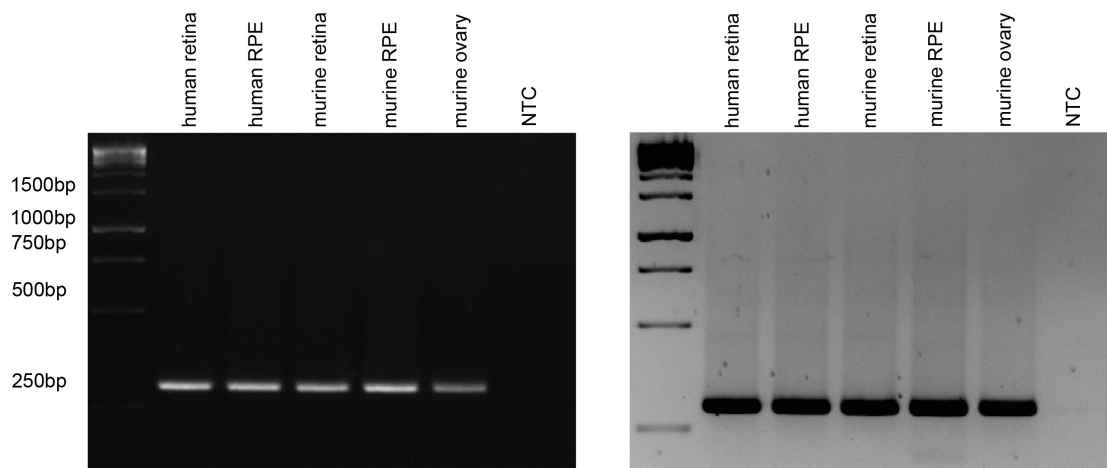

inverse image and higher exposure time

**Figure S6. mRNA expression of *RCBTB1/Rcbtb1*, *CUL3/Cul3* and *ACTB/Actb* in human and murine tissues**

RT-PCR of *RCBTB1/Rcbtb1* (upper panel) and *CUL3/Cul3* (middle panel) shows bands of expected size in human retina and RPE (weak), and in murine retina, RPE and ovary. *β-Actin* (*ACTB/Actb*, housekeeping gene) expression is shown in the lower panel. Human retina and RPE mRNA were extracted from an adult human donor (University of Cologne) and murine tissues from 10 weeks old C57BL/6 mice (4 retinas from 2 mice and 8 RPE from 4 mice).

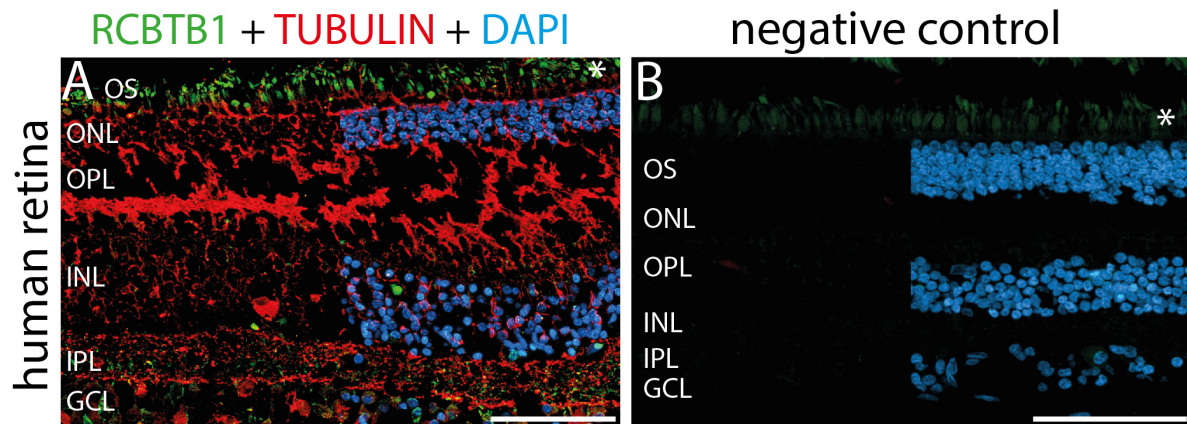

**Figure S7. Co-staining of RCBTB1 and acetylated  $\alpha$  tubulin**

**Left.** Representative fluorescent images of horizontal paraffin-embedded cross-sections of human outer retina from donor eyes stained with anti-RCBTB1 antibody (green, 1:100, Abcam), anti-acetylated  $\alpha$  tubulin (red, 1:250, Sigma Aldrich), and retinal counterstaining with 4',6-diamidino-2-phenylindole (DAPI) (blue). Immunohistochemistry was performed as described previously.<sup>1</sup> No clear ciliary co-localization could be observed. **Right. Control staining lacking primary antibody.** The green colour in the OS denotes autofluorescence of the photoreceptor cells (asterisks). Abbreviations used: OS, outer segments; ONL, outer nuclear layer; OPL, outer plexiform layer.

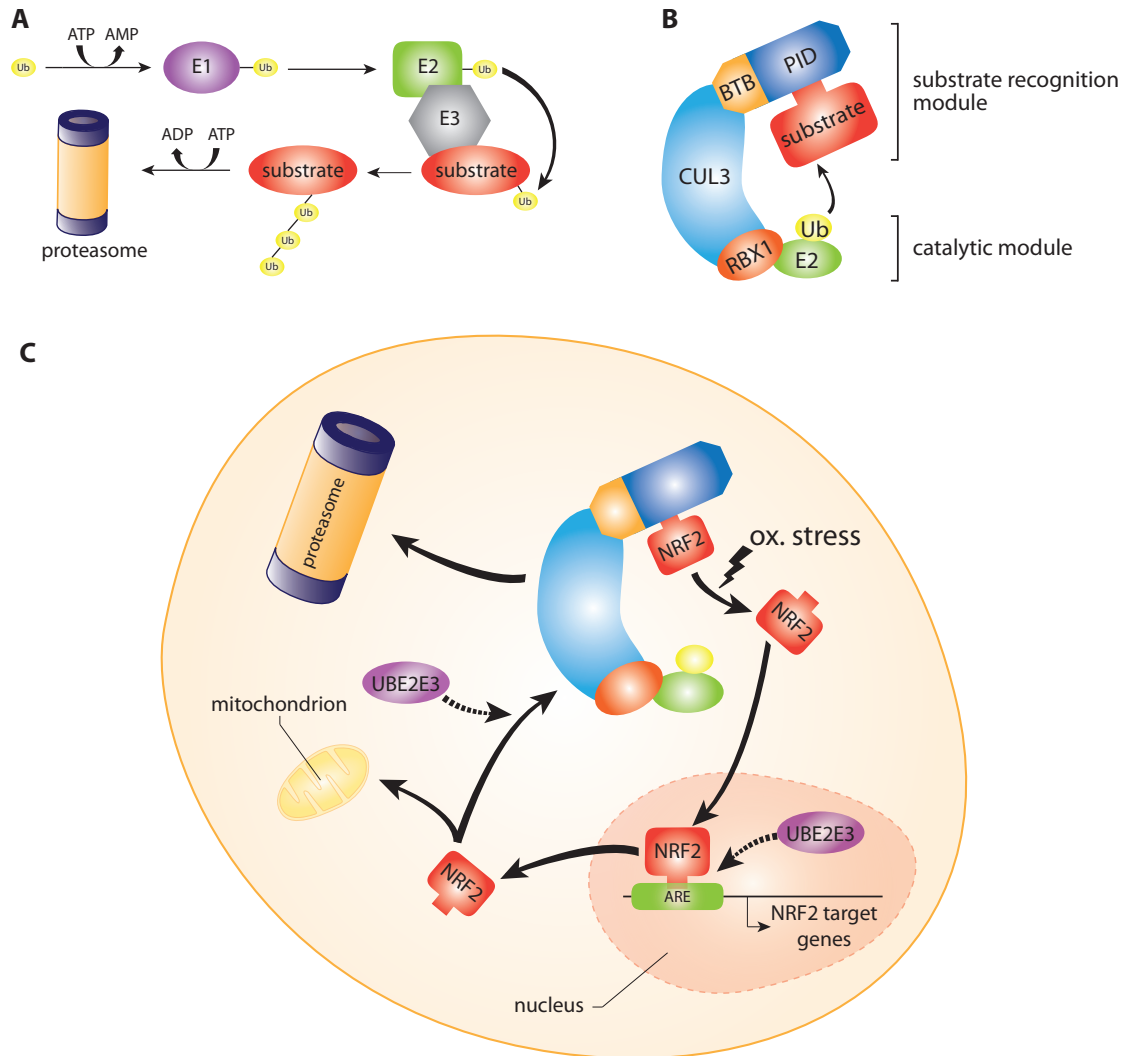

**Figure S8. The role of different ubiquitination components in regulating NFE2L2 activity**

**A.** The ubiquitin-proteasome pathway. **B.** The CULLIN3-RING ubiquitin ligase (CRL3) complex. In this complex, CUL3 serves a molecular scaffold between a catalytic module, composed of a RING finger domain protein (RBX1) recruiting an E2 enzyme, and a substrate recognition module. Substrate recognition is highly specific and is mediated by substrate adaptors such as RCBTB1, which bind CUL3 via a BTB domain and the substrate through a protein-protein interaction domain (PID). **C.** Simplified model of NFE2L2 (NRF2) regulation by a CRL3 complex and UBE2E3. Under basal conditions, NFE2L2 is polyubiquitinated by a CRL3 complex and degraded by the proteasome. Upon oxidative stress, NFE2L2 is released from this complex, translocates to the nucleus and binds antioxidant response elements (ARE), thus initiating gene transcription. Finally, NFE2L2 is localized to the cytoplasm (CRL3 complex) or mitochondria. UBE2E3 plays a role in both the activation and localization of NFE2L2. Figures adapted from <sup>2-4</sup>.

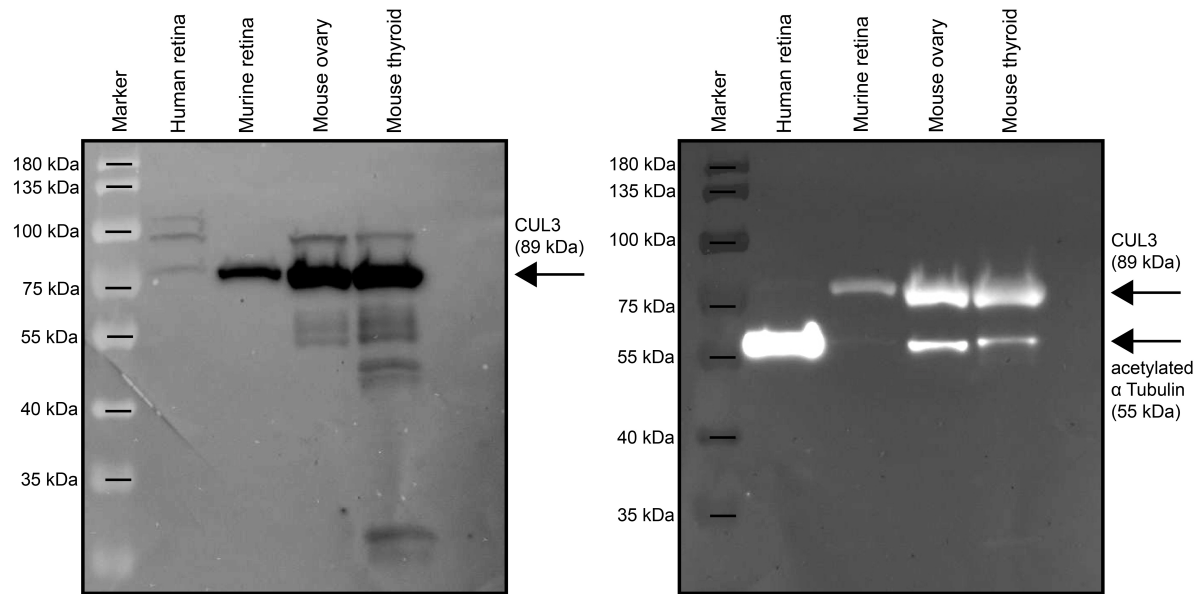

**Figure S9. Western blot with CUL3 and  $\alpha$  Tubulin antibody**

**Left.** Western blot with anti-CUL3 antibody (Sigma) shows a weak band of 89 kDa in human retina and stronger bands in murine retina, ovary and thyroid. **Right.** Western blot with anti-acetylated  $\alpha$  Tubulin (55 kDa, Sigma Aldrich) and anti-CUL3 (89 kDa) antibodies.



**Table S1. Population frequencies and *in silico* predictions of *RCBTB1* mutations identified**  
UniProt was used to look up protein domains (Q8NDN9). All other information with exception of the C-scores (CADD v1.3),<sup>5</sup> was derived from Alamut Visual version 2.7 rev. 1 (NM\_018191.3).

| Catalogue number | Amplicon context sequence (GRCh38) |
|------------------|------------------------------------|
| PXL-A0073925     | Chr13:49533970-49534317            |
| PXL-A0073926     | Chr13:49540669-49541087            |
| PXL-A0073927     | Chr13:49541599-49542276            |
| PXL-A0073928     | Chr13:49544581-49544980            |
| PXL-A0073929     | Chr13:49549331-49549678            |
| PXL-A0073930     | Chr13:49551171-49551552            |
| PXL-A0073932     | Chr13:49555433-49555778            |
| PXL-A0073933     | Chr13:49559700-49560134            |
| PXL-A0073934     | Chr13:49566520-49566937            |
| PXL-A0073935     | Chr13:49567005-49567433            |
| PXL-A0285511     | Chr13:49552130-49552481            |

**Table S2. PCR assays used for sequencing of the coding region of *RCBTB1***

All coding regions of *RCBTB1* were sequenced in 281 iRD probands using pxlence targeted resequencing assays, followed by library preparation with the Nextera XT DNA Library Preparation Kit (Illumina) and sequencing on a MiSeq instrument (Illumina).<sup>6</sup> Other primer sequences used in this study are available on request.



| <b>Family</b> | <b>Individual</b> | <b>Enrichment kit - sequencer</b>                                    | <b>Mean coverage</b> |
|---------------|-------------------|----------------------------------------------------------------------|----------------------|
| F1            | V:1               | TruSeq Exome Enrichment - HiSeq 2000 (Illumina)                      | 97.2                 |
|               | IV:3              |                                                                      | 121.6                |
| F2            | II:4              | SureSelect Human All Exon V5 (Agilent) – HiSeq 2000/2500 (Illumina)  | 43                   |
|               | II:5              |                                                                      | 42                   |
|               | II:6              |                                                                      | 43                   |
| F3            | II:1              | SureSelect Human All Exon 50/51 Mb (Agilent) - HiSeq 2500 (Illumina) | 52.97                |
| F4            | III:2             | SureSelect Human All Exon 50/51 Mb (Agilent) - HiSeq 2500 (Illumina) | 66.83                |
| F5            | II:6              | SureSelect Human All Exon V5 (Agilent) – HiSeq 2000 (Illumina)       | 78                   |
| F6            | II:2              | SeqCap EZ Exome v3 (NimbleGen) - HiSeq 2000 (Illumina)               | 112.1                |

**Table S3. Whole exome sequencing methods and mean coverage**

| Family | Genotype                                         | Gene<br>(transcript)                              | cDNA                            | protein       | Selection<br>based on                            | Arguments in<br>favor of<br>exclusion                      |
|--------|--------------------------------------------------|---------------------------------------------------|---------------------------------|---------------|--------------------------------------------------|------------------------------------------------------------|
| F1     | HOM                                              | <i>COG3</i><br>(NM_031431.3)<br>(MIM *606975)     | c.1931-21del<br>(rs558175293)   | p.?           | <i>In silico</i><br>predictions<br>(splicing)    | Homozygotes<br>in ExAC; cDNA<br>analysis of<br><i>COG3</i> |
|        | HOM                                              | <i>NEK3</i><br>(NM_001146099.1)<br>(MIM *604044)  | c.876_876+1insA<br>(rs72514762) | p.Gln293Thrfs | <i>In silico</i><br>predictions<br>(splicing)    | Homozygous<br>in healthy<br>control<br>individuals         |
| F2*    | No potential disease-causing variants identified |                                                   |                                 |               |                                                  |                                                            |
| F3     | No potential disease-causing variants identified |                                                   |                                 |               |                                                  |                                                            |
| F4     | No potential disease-causing variants identified |                                                   |                                 |               |                                                  |                                                            |
| F5*    | HET                                              | <i>CACNA2D4</i><br>(NM_172364.4)<br>(MIM *608171) | c.2087A>G                       | p.His696Arg   | <i>In silico</i><br>predictions<br>(missense)    | Population<br>frequency<br>(rs115228472)                   |
|        | HET                                              |                                                   | c.2065A>G                       | p.Ile689Val   | 2 <sup>nd</sup> variant<br>in<br><i>CACNA2D4</i> | Population<br>frequency<br>(rs76224631)                    |
| F6     | No potential disease-causing variants identified |                                                   |                                 |               |                                                  |                                                            |

**Table S4. Candidate variants in known or candidate iRD genes identified by whole exome sequencing**

Abbreviations used: HET, heterozygous; HOM, homozygous. \*Families F2 and F5 were selected for WES based on a common retinal phenotype (small atrophic spots in the macular area that tend to go to confluence), which appeared not to be linked to any known RD gene.

| INPUT             | Prioritization tool | Endeavour            | GeneDistiller        | PosMed               | ToppGene         | G2D                  |
|-------------------|---------------------|----------------------|----------------------|----------------------|------------------|----------------------|
|                   | Prior knowledge     | Training set         | Training set         | Phenotype (goiter)   | Training set     | Training set         |
|                   | Search space        | Chromosomal position | Chromosomal position | Chromosomal position | Gene list        | Chromosomal position |
| Ranked genes list |                     |                      |                      |                      |                  |                      |
| OUTPUT            | 1                   | <i>RB1</i>           | <i>ENOX1</i>         | <i>CPB2</i>          | <i>RB1</i>       | <i>FNDC3A</i>        |
|                   | 2                   | <i>LCP1</i>          | <i>COG3</i>          | <i>RB1</i>           | <i>HTR2A</i>     | <i>ITM2B</i>         |
|                   | 3                   | <i>ITM2B</i>         | <i>ATP7B</i>         | <i>MLNR</i>          | <i>NAA16</i>     | <i>ATP7B</i>         |
|                   | 4                   | <i>AKAP11</i>        | <i>RB1</i>           | <i>TNFSF11</i>       | <i>LCP1</i>      | <i>TNFSF11</i>       |
|                   | 5                   | <i>ATP7B</i>         | <i>CYSLTR2</i>       | <i>CYSLTR2</i>       | <i>GTF2F2</i>    | <i>PCDH8</i>         |
|                   | 6                   | <i>HTR2A</i>         | <i>HTR2A</i>         | <i>HTR2A</i>         | <i>ATP7B</i>     | <i>LECT1</i>         |
|                   | 7                   | <i>INTS6</i>         | <i>MLNR</i>          | <i>ATP7B</i>         | <i>ZC3H13</i>    | <i>RB1</i>           |
|                   | 8                   | <i>TRIM13</i>        | <i>TNFSF11</i>       | <i>ITM2B</i>         | <i>NAP1L4P3</i>  | <i>GTF2F2</i>        |
|                   | 9                   | <b><i>RCBTB1</i></b> | <i>LPAR6</i>         | <i>ESD</i>           | <i>POLR2KP2</i>  | <i>TSC22D1</i>       |
|                   | 10                  | <i>LECT1</i>         | <b><i>RCBTB1</i></b> | <i>ARL11</i>         | <i>LINC00562</i> | <i>COG3</i>          |

**Table S5: Thyroid disease - prioritization of genes located in the IBD region of F1**

Gene prioritization of genes located in the IBD region of F1 was performed using five tools. Data input is the chromosomal position of the IBD region (or the list of genes located in the IBD region) and the selected phenotype or the following training set: *NKX2-1*, *PAX8*, *FOXE1*, *GNAS*, *TSHR*, *TPO*, *TG*, *SLC5A5*, *SLC26A4*, *DUOX1*, *DUOX2*, *IYD*. Coordinates IBD region: chr13:41820714-53537171 (GRCh37/hg19). The first 10 hits of each output are shown.

| Gene                        | gDNA (GRCh37)       | cDNA       | Protein      | Transcript ID   | Case samples |      |     |      | Predictions                                                                                                                                                                                                                                                             | Sanger sequencing             |                                                                                                                                                                              |                              | Conclusion                                                                                |
|-----------------------------|---------------------|------------|--------------|-----------------|--------------|------|-----|------|-------------------------------------------------------------------------------------------------------------------------------------------------------------------------------------------------------------------------------------------------------------------------|-------------------------------|------------------------------------------------------------------------------------------------------------------------------------------------------------------------------|------------------------------|-------------------------------------------------------------------------------------------|
|                             |                     |            |              |                 | Coverage     |      | VAF |      |                                                                                                                                                                                                                                                                         | Confirmati on in case samples | Segregation analysis                                                                                                                                                         | 5 Control samples            |                                                                                           |
|                             |                     |            |              |                 | V:1          | IV:3 | V:1 | IV:3 |                                                                                                                                                                                                                                                                         |                               |                                                                                                                                                                              |                              |                                                                                           |
| <i>DUOX2</i> (MIM *60675 9) | chr15:45 402883G >C | c.908C >G  | p.P303R      | NM_01408 0.4    | 77           | 78   | 39  | 29.5 | AlignGVGD: C65 (GV:0.00-GD:102.71)<br>SIFT: deleterious (score: 0)<br>MutationTaster: disease causing (p-value: 1)<br>Polyphen: probably damaging (1.000)<br>Grantham:103<br>PhyloP: 5.45<br>dbSNP: rs151261408<br>ExAC: ALL: G=1.07%<br>ESP: EA: C=1.77% - AA: C=0.25% | Confirmed (V:1 and IV:3)      | - Present in affected individuals (V:1; IV3; IV:2)<br>- Absent in affected individual (V:2)<br>- Absent in healthy individuals (V:3; IV:1; III:5; III:6; IV:8; V:4)          | Absent                       | Excluded: absent in affected individual (V:2) and present in normal controls <sup>7</sup> |
| <i>NEK3</i> (MIM *60404 4)  | chr13:52 718059d up | c.868d upA | p.R290fs *10 | NM_00114 6099.1 | 50           | 43   | 70  | 72.1 |                                                                                                                                                                                                                                                                         | Confirmed (V:1 and IV:3)      | - Homozygous in affected individuals (V:1; IV:3; V2)<br>- Heterozygous in affected individual (IV:2)<br>- Absent in healthy individuals (V:3; IV:1; III:5; III:6; IV:8; V:4) | Homozygous in control sample | Excluded: homozygous in healthy control                                                   |

**Table S6: Analysis of thyroid related genes in WES data of F1**

Variant interpretation was performed using Ingenuity Variant Analysis (IVA) ((QIAGEN, 2015 Release Spring) and Alamut Visual version 2.7 rev.

1. Segregation analysis in affected and healthy family members was performed when a variant was confirmed by Sanger sequencing in V:3 and IV:3. Abbreviation used: VAF, variant allele frequency.

| Function                                   | Name                          | Description                                                                    |
|--------------------------------------------|-------------------------------|--------------------------------------------------------------------------------|
| Synthesis and conjugation of glutathione   | <i>GCLC</i> (MIM *606857)     | Glutamate-cysteine ligase, catalytic subunit                                   |
|                                            | <i>GCLM</i> (MIM *601176)     | Glutamate-cysteine ligase modifier subunit                                     |
|                                            | <i>GSR</i> (MIM +138300)      | Glutathione reductase                                                          |
|                                            | <i>GSTA4</i> (MIM *605450)    | Glutathione S-transferase alpha 4                                              |
|                                            | <i>MGST2</i> (MIM *601733)    | Microsomal glutathione S-transferase 2                                         |
| Antioxidant                                | <i>PRDX1</i> (MIM *176763)    | Peroxiredoxin 1                                                                |
| Drug metabolizing enzymes and transporters | <i>EPHX1</i> (MIM +132810)    | Epoxide hydrolase 1                                                            |
|                                            | <i>NQO1</i> (MIM +125860)     | NAD(P)H dehydrogenase, quinone 1                                               |
|                                            | <i>ABCB6</i> (MIM *605452)    | ATP binding cassette subfamily B member 6 (Langereis blood group)              |
|                                            | <i>ABCC1</i> (MIM *158343)    | ATP binding cassette subfamily C member 1                                      |
|                                            | <i>SLC25A25</i> (MIM *608745) | Solute carrier family 25 (mitochondrial carrier; phosphate carrier), member 25 |
|                                            | <i>SLC48A1</i> (MIM *612187)  | Solute carrier family 48 (heme transporter), member 1                          |
| Metabolic enzymes                          | <i>IDH1</i> (MIM *147700)     | Isocitrate dehydrogenase 1 (NADP+)                                             |
|                                            | <i>LPL</i> (MIM +609708)      | Lipoprotein lipase                                                             |
| Heme and iron metabolism                   | <i>FECH</i> (MIM *612386)     | Ferrochelatase                                                                 |
| Transcription factors                      | <i>AHR</i> (MIM *600253)      | Aryl hydrocarbon receptor                                                      |
|                                            | <i>HES1</i> (MIM *139605)     | Hes family bHLH transcription factor 1                                         |
|                                            | <i>RXRA</i> (MIM *180245)     | Retinoid X receptor alpha                                                      |
|                                            | <i>NOTCH1</i> (MIM *190198)   | Notch 1                                                                        |
|                                            | <i>YAF2</i> (MIM *607534)     | YY1 associated factor 2                                                        |
| Cytokines                                  | <i>IL6</i> (MIM *147620)      | Interleukin 6                                                                  |

**Table S7. NFE2L2 target genes investigated in this study**

In total, 21 NFE2L2 target genes were selected from <sup>8,9</sup>.

| Target          | p-value<br>(corrected) | p-value  | Ratio<br>(controls/affected<br>individuals) |
|-----------------|------------------------|----------|---------------------------------------------|
| <b>RXRA</b>     | <b>0.000674</b>        | 0.000027 | 5.069                                       |
| <b>NFE2L2</b>   | <b>0.001116</b>        | 0.000089 | 2.917                                       |
| <b>IDH1</b>     | <b>0.002418</b>        | 0.000290 | 3.59                                        |
| <b>CUL3</b>     | <b>0.004803</b>        | 0.000769 | 1.635                                       |
| <b>SLC25A25</b> | <b>0.025850</b>        | 0.005170 | 1.504                                       |
| EPHX1           | 0.075750               | 0.018180 | 5.34                                        |
| RBX1            | 0.137906               | 0.041600 | 1.625                                       |
| HES1            | 0.137906               | 0.044130 | 0.197                                       |
| NQO1            | 0.270778               | 0.097480 | 0.781                                       |
| GCLC            | 0.336250               | 0.134500 | 1.127                                       |
| AHR             | 0.367344               | 0.162600 | 1.784                                       |
| ABCB6           | 0.367344               | 0.199200 | 2.417                                       |
| MGST2           | 0.367344               | 0.206100 | 4.24                                        |
| IL6             | 0.367344               | 0.223300 | 2.828                                       |
| ABCC1           | 0.367344               | 0.226900 | 1.665                                       |
| PRDX1           | 0.367344               | 0.235100 | 1.619                                       |
| GSTA4           | 0.434853               | 0.295700 | 2.174                                       |
| FECH            | 0.470875               | 0.367900 | 1.096                                       |
| YAF2            | 0.470875               | 0.371000 | 2.605                                       |
| LPL             | 0.470875               | 0.376700 | 3.722                                       |
| GCLM            | 0.510341               | 0.445000 | 1.241                                       |
| GSR             | 0.510341               | 0.449100 | 0.917                                       |
| SLC48A1         | 0.859783               | 0.791000 | 1.16                                        |
| NOTCH1          | 0.907083               | 0.870800 | 0.945                                       |
| UBE2E3          | 0.982400               | 0.982400 | 0.989                                       |

**Table S8. Statistical analysis on mRNA expression results**

Statistical analysis was performed on log-transformed data using an unpaired t-test assuming unequal variances (qbase+, Biogazelle). Correction for multiple testing was performed using the multtest package (Bioconductor, R). The expression of five genes, indicated in bold, was significantly decreased in the group with 2 affected individuals in comparison with the control group (6 individuals) (p-value < 0.05). For the majority of the other genes, the ratio between the control group and group with affected individuals showed a trend of decreased mRNA expression in the affected individuals versus controls.

## Supplemental References

- 1 Karlstetter, M. et al. (2014). Disruption of the retinitis pigmentosa 28 gene *Fam161a* in mice affects photoreceptor ciliary structure and leads to progressive retinal degeneration. *Hum Mol Genet* 23, 5197-5210.
- 2 Pagan, J., Seto T., Pagano M. & Cittadini A. (2013). Role of the ubiquitin proteasome system in the heart. *Circ Res* 112, 1046-1058.
- 3 Genschik, P., Sumara I. & Lechner E. (2013). The emerging family of CULLIN3-RING ubiquitin ligases (CRL3s): cellular functions and disease implications. *EMBO J* 32, 2307-2320.
- 4 Plafker, K.S. & Plafker S.M. (2015). The ubiquitin-conjugating enzyme UBE2E3 and its import receptor importin-11 regulate the localization and activity of the antioxidant transcription factor NRF2. *Mol Biol Cell* 26, 327-338.
- 5 Kircher, M., Witten D.M., Jain P., O'Roak B.J., Cooper G.M. & Shendure J. (2014). A general framework for estimating the relative pathogenicity of human genetic variants. *Nat Genet* 46, 310-315.
- 6 De Leeneer, K. et al. (2015). Flexible, scalable, and efficient targeted resequencing on a benchtop sequencer for variant detection in clinical practice. *Hum Mutat* 36, 379-387.
- 7 Muzza, M. et al. (2014). The clinical and molecular characterization of patients with dysmaturational congenital hypothyroidism reveals specific diagnostic clues for *DUOX2* defects. *J Clin Endocrinol Metab* 99, E544-553.
- 8 Suzuki, T., Motohashi H. & Yamamoto M. (2013). Toward clinical application of the Keap1-Nrf2 pathway. *Trends Pharmacol Sci* 34, 340-346.
- 9 Al-Sawaf, O., Clarner T., Fragoulis A., Kan Y.W., Pufe T., Streetz K. & Wruck C.J. (2015). Nrf2 in health and disease: current and future clinical implications. *Clin Sci (Lond)* 129, 989-999.

## Supplemental Web Resources

UCSC Genome Browser, <https://genome.ucsc.edu>

HomozygosityMapper, <http://www.homozygositymapper.org>

pxlence, <https://www.pxlence.com>

Primer3plus, <http://primer3plus.com/cgi-bin/dev/primer3plus.cgi>

UniProt, <http://www.uniprot.org>

CADD, <http://cadd.gs.washington.edu>

Online Mendelian Inheritance in Man, <http://www.omim.org>

Endeavour, <http://homes.esat.kuleuven.be/~bioiuser/endeavour/tool/endeavourweb.php>

GeneDistiller, <http://www.genedistiller.org>

PosMed, <http://omicspace.riken.jp/PosMed>

ToppGene, <https://toppgene.cchmc.org/prioritization.jsp>

G2D, [http://g2d2.ogic.ca/index\\_known.html#use](http://g2d2.ogic.ca/index_known.html#use)
